# Supplementary material for: Real-world analysis of manual editing of deep learning contouring in the thorax region
Source: PubMed Central journal article supplement — Phys Imaging Radiat Oncol. 2022 May 14;22:104–10. doi: 10.1016/j.phro.2022.04.008 (PMC9115320; doi:10.1016/j.phro.2022.04.008), 2022-05-14
Supplement: mmc1.pdf [file mmc1.pdf]

## SUPPLEMENTARY MATERIAL

# Real-world analysis of manual editing of deep learning contouring in the thorax region

Femke Vaassen <sup>a,\*</sup>, Djamal Boukerroui <sup>b,1</sup>, Pdraig Looney <sup>b</sup>, Richard Canters <sup>a</sup>, Karolien Verhoeven <sup>a</sup>, Stephanie Peeters <sup>a</sup>, Indra Lubken <sup>a</sup>, Jolein Mannens <sup>a</sup>, Mark J. Gooding <sup>b</sup>, Wouter van Elmpt <sup>a</sup>

<sup>a</sup> Department of Radiation Oncology (Maastr), GROW School for Oncology, Maastricht University Medical Centre+, Maastricht, The Netherlands

<sup>b</sup> Mirada Medical Ltd., Oxford, United Kingdom

\* Corresponding author, E-mail address: [femke.vaassen@maastro.nl](mailto:femke.vaassen@maastro.nl)  
Postbox 3035, 6202 NA Maastricht, the Netherlands.

<sup>1</sup> FV and DB are joint first authors, having contributed equally to the writing of this manuscript.

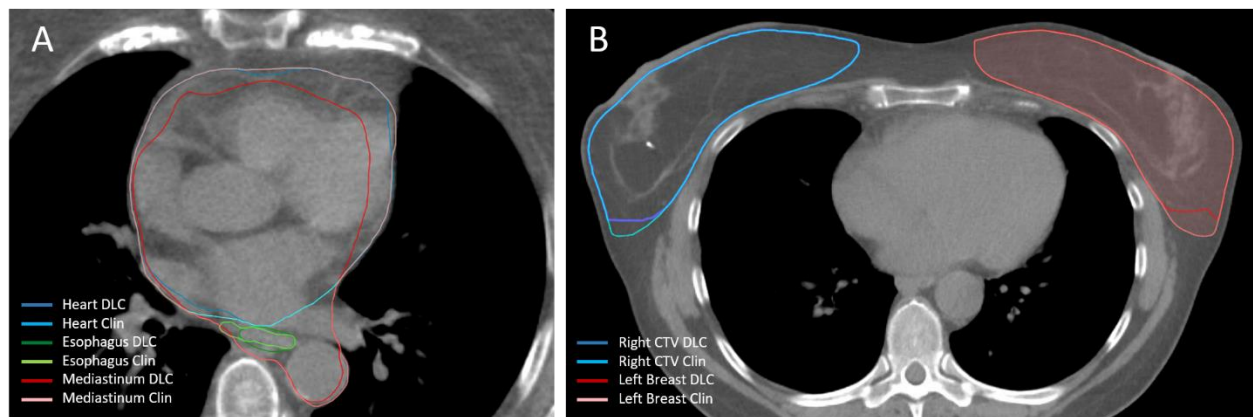

Figure S1 – Representative example of the DLC-contours and edited contours for a (A) lung and (B) breast cancer patient for some of the OARs. Left breast represents the contralateral breast.

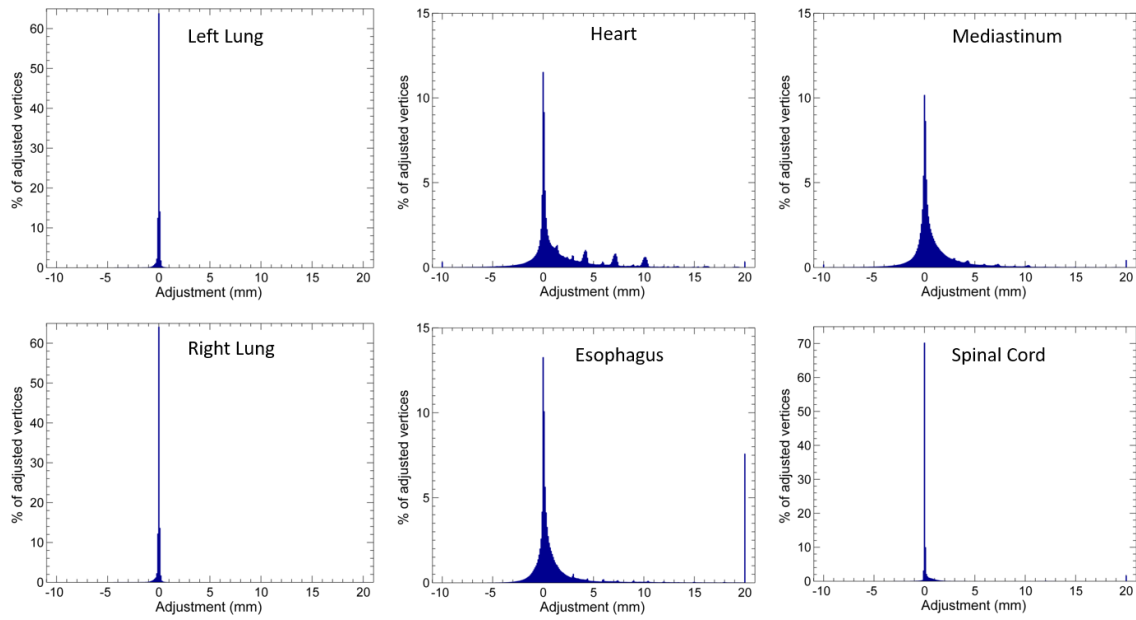

Figure S2 – Histograms of adjustments over all patients for the lung cancer group. OARs: left lung, right lung, heart, esophagus, mediastinum, and spinal cord.

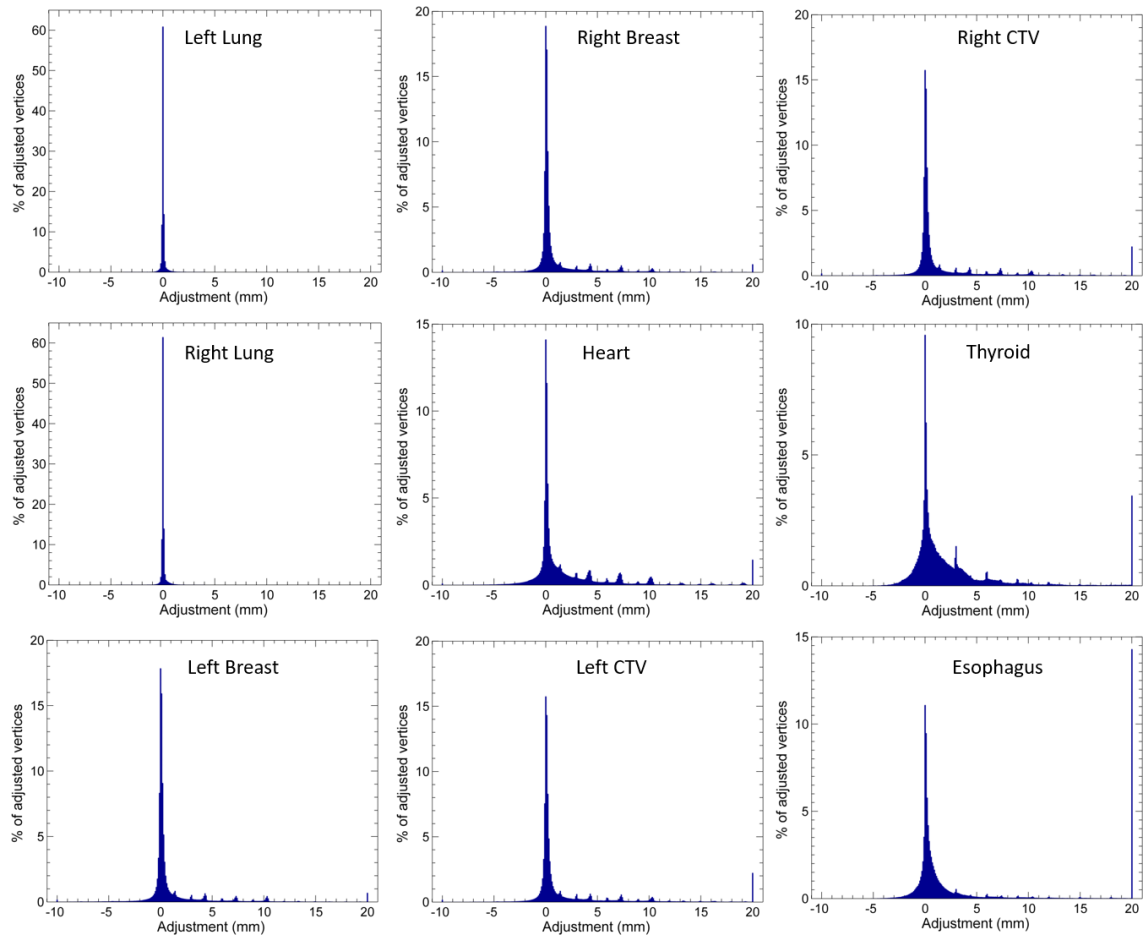

Figure S3 – Histograms of adjustments over all patients for the breast cancer group. OARs: left lung, right lung, left (contralateral) breast, right (contralateral) breast, heart, left CTV breast, right CTV breast, thyroid, and esophagus.

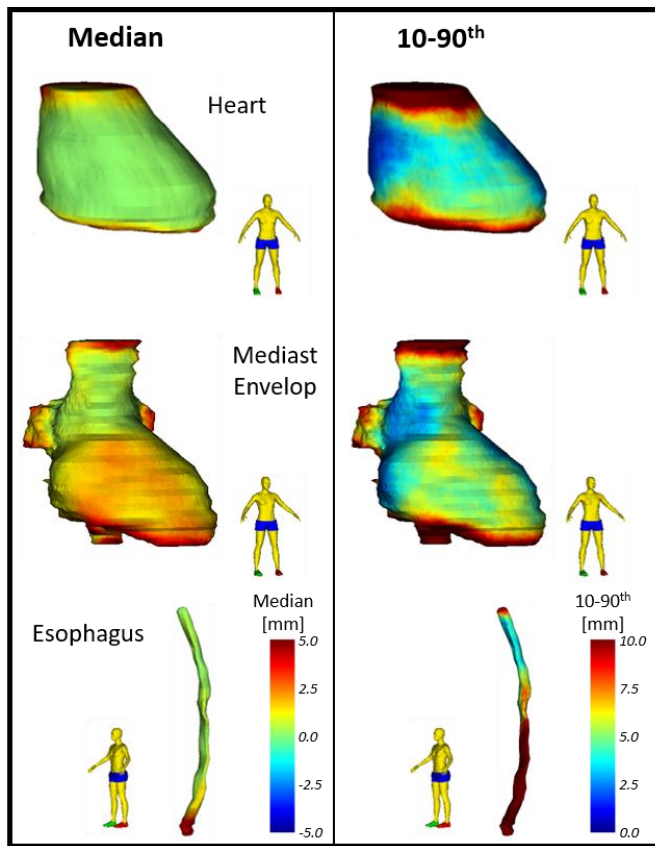

Figure S4 – Spatial adjustments showing median and 10–90th percentile range projected on the reference shape of the subsampled OARs in the lung cancer group. The interpolated DLC RTSS was compared to the clinical RTSS to simulate the situation when no subsampling is used. Abbreviations: DLC = deep-learning contouring, RTSS = RT Structure Set.

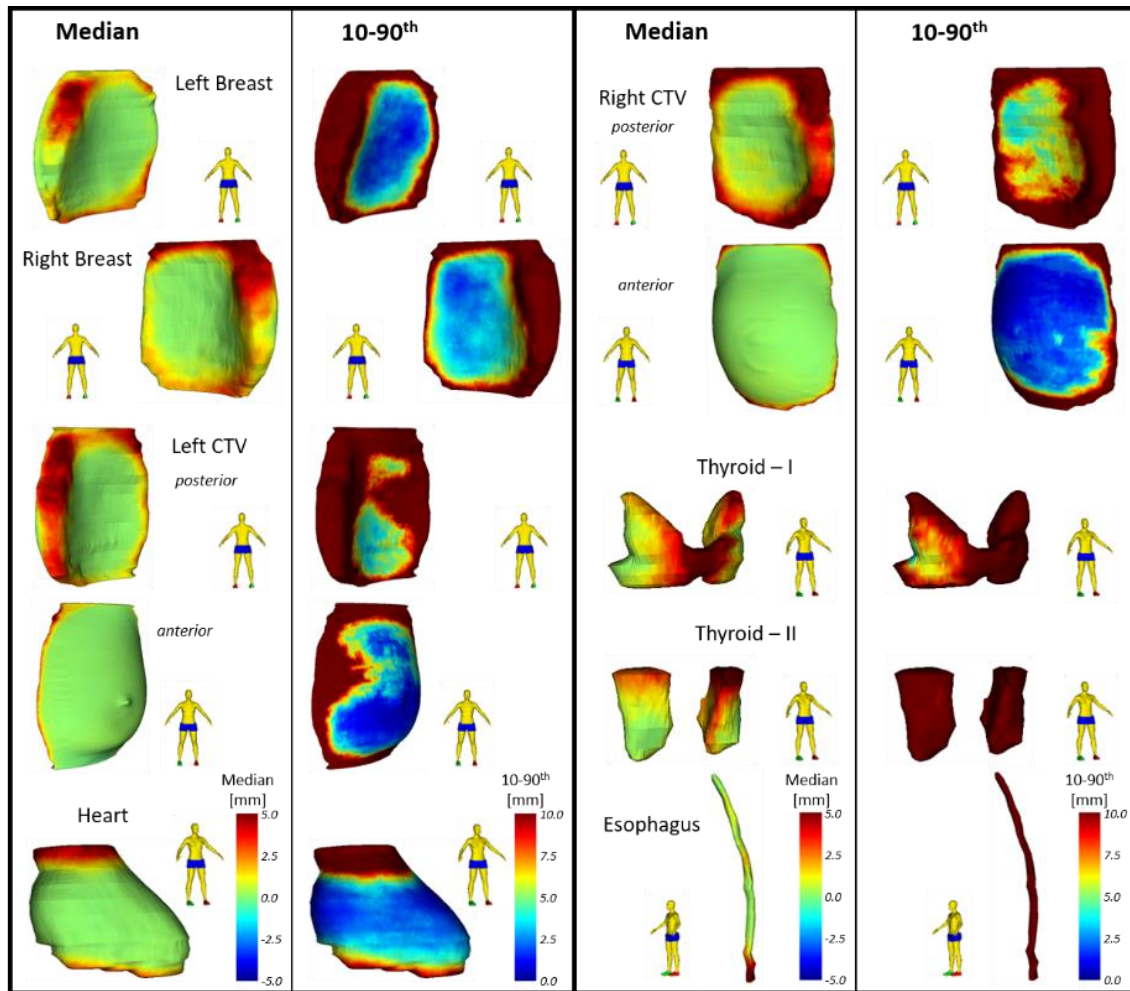

Figure S5 – Spatial adjustments showing median and 10–90<sup>th</sup> percentile range projected on the reference shape of the subsampled OARs in the breast cancer group. The interpolated DLC RTSS was compared to the clinical RTSS to simulate the situation when no subsampling is used. Left and Right Breast represent the contralateral breast, left and right CTV represent the CTV breast. Abbreviations: DLC = deep-learning contouring, RTSS = RT Structure Set.

Videos of all the spatial adjustments per patient group and per organ are also added as Supplementary Material, see “SupplementaryVideos.pptx”.
